# Supplementary material for: Novel Schiff base iron(ii) phthalocyanine with composite MWCNTs on modified GCE: electrochemical sensor development for paracetamol
Source: Royal Society of Chemistry journal article supplement (doi:10.1039/d2re00193d), 2022-01-01
Supplement: d2re00193d1.pdf [file d2re00193d1.pdf]

## Novel Schiff base Iron (II) phthalocyanine with composite MWCNTs on modified GCE: Electrochemical sensors development of paracetamol

<sup>a,\*</sup>Mounesh, <sup>a</sup>K. R. Venugopala Reddy, <sup>b</sup>D. Yuvaraja, <sup>b</sup>Juan. M. Manriquez, <sup>a</sup>K. S. Lokesh, M. K. Amshumali<sup>c</sup>

<sup>a,\*</sup>Department of Studies and Research in Chemistry Vijayanagara Sri Krishnadevaraya University, Ballari – 583105 Karnataka (India)

<sup>b</sup>Quimica y de Farmacia, Pontificia Universidad Catolica de Chile, Avenida Vicuña Mackenna 4860, Macul, Santiago, Chile

<sup>c</sup>Department of Studies and Research in Industrial Chemistry Vijayanagara Sri Krishnadevaraya University, Ballari – 583105 Karnataka (India)

(Email: [mounesh.m.nayak@gmail.com](mailto:mounesh.m.nayak@gmail.com), Cell No: +91-8197546693)

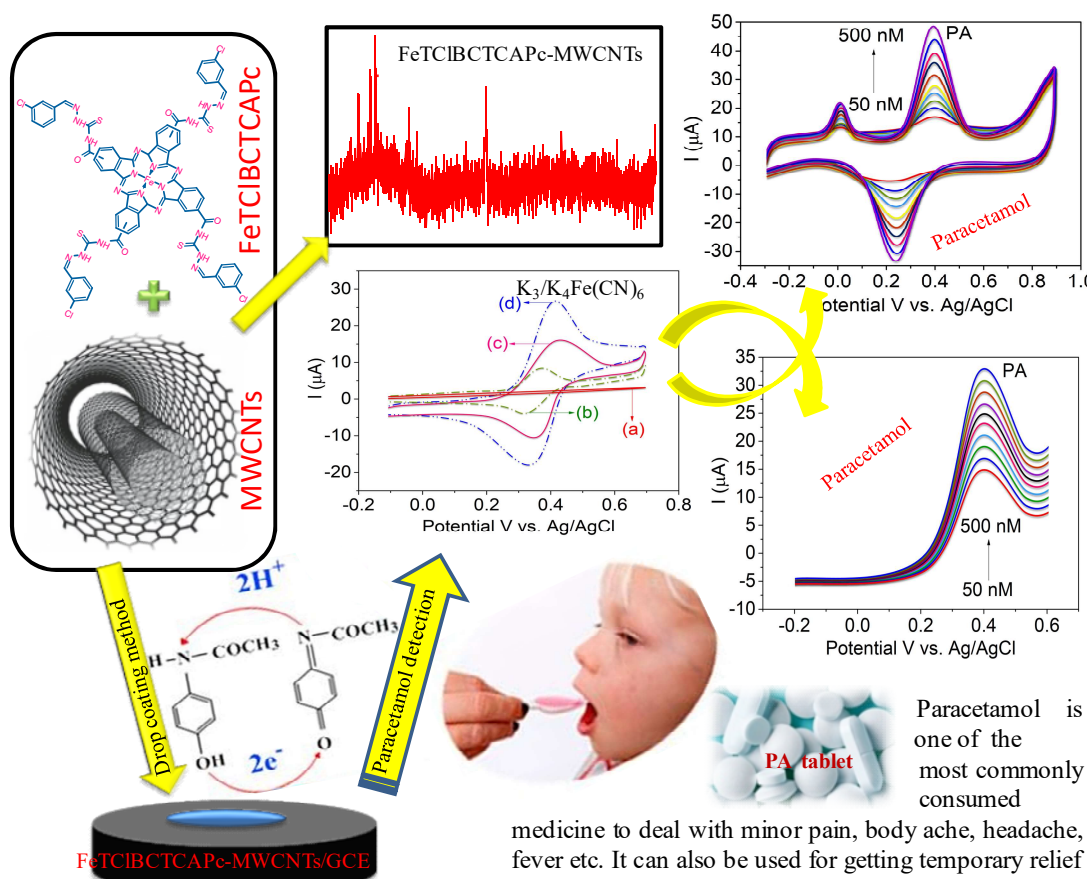

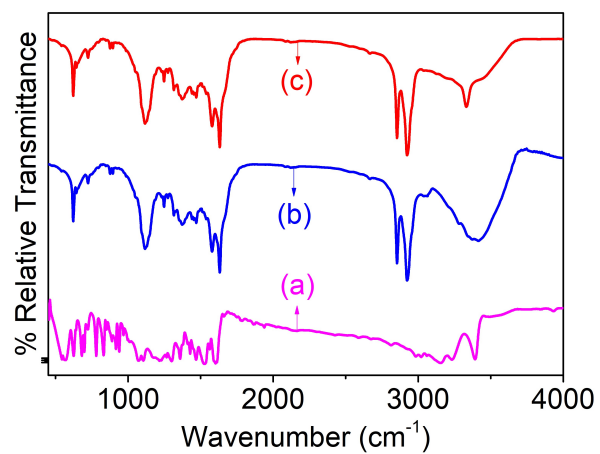

**Fig.S1:** FTIR spectra of (a) ClBCTA, (b) FeTCAPc, and (c) FeTClBCTCAPc.

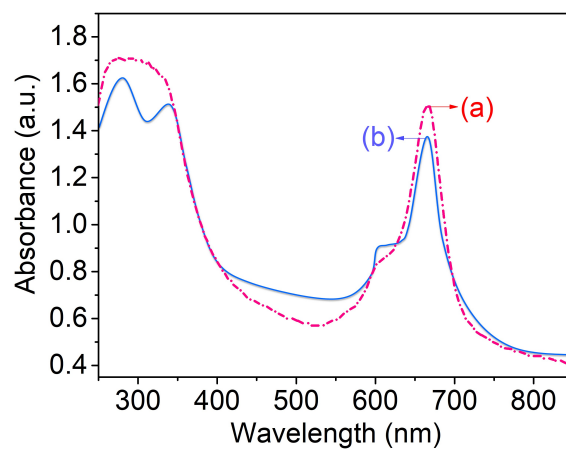

**Fig.S2:** UV-Vis spectrum of (a) FeTCAPc and (b) FeTClBCTCAPc.

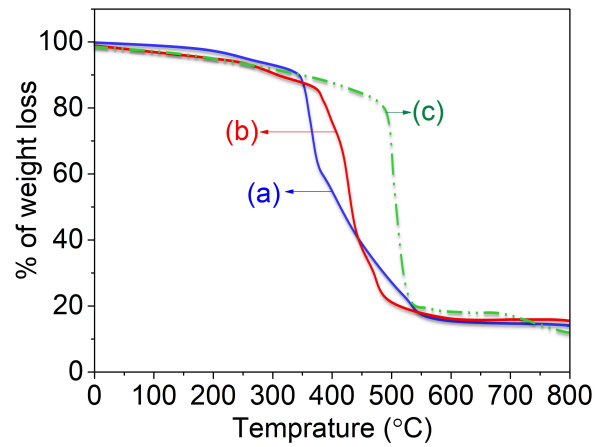

**Fig.S3:** Thermogravimetric analysis of (a) FeTCAPc, (b) FeTCIBCTCAPc and (c) FeTCIBCTCAPc-MWCNT.

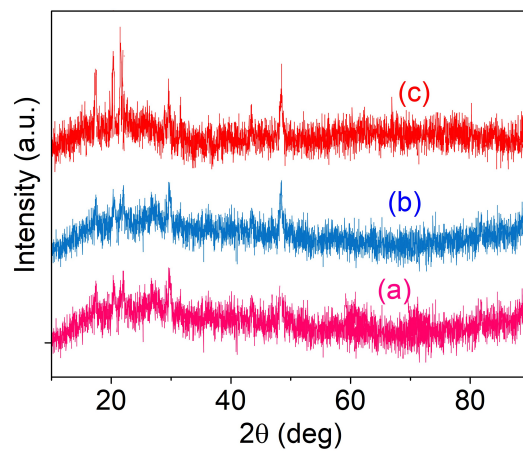

**Fig.S4:** Powder XRD analysis of (a) FeTCAPc, (b) FeTCIBCTCAPc and (c) FeTCIBCTCAPc-MWCNTs.

6M

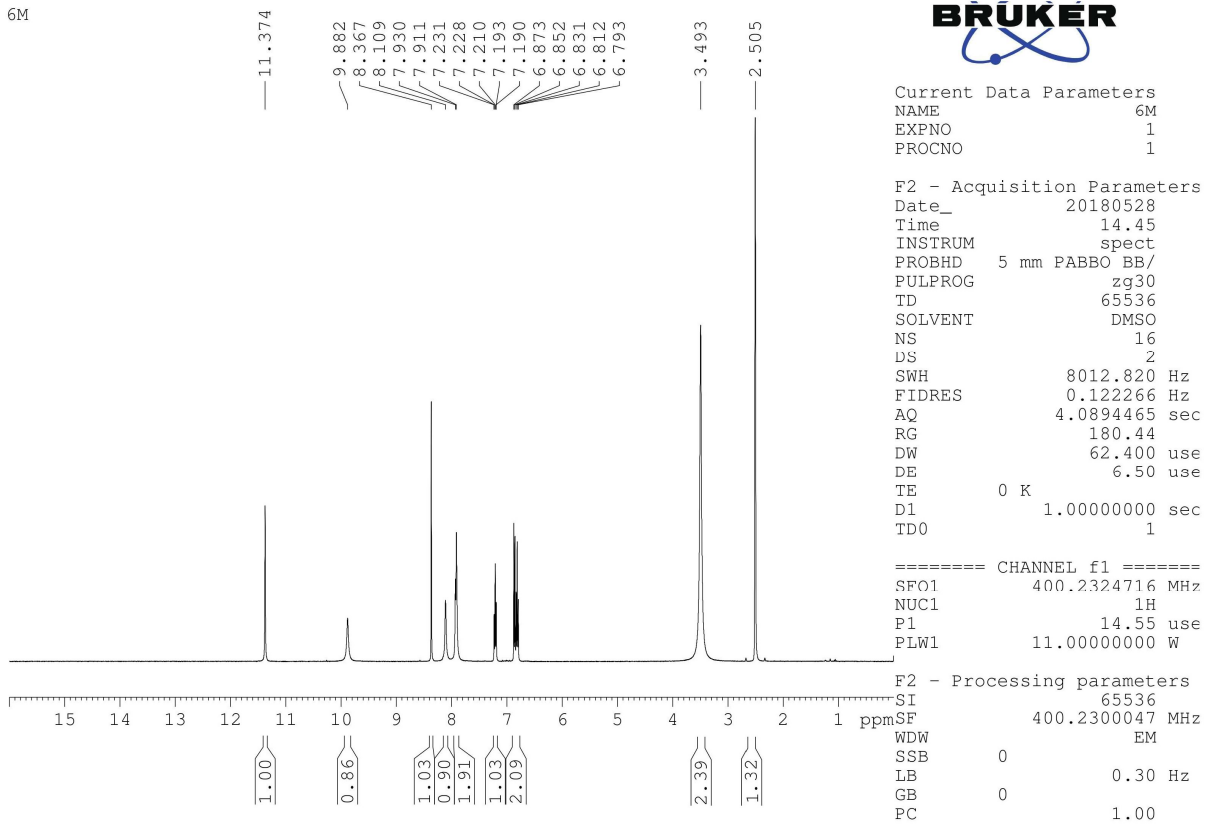

Fig.S5: <sup>1</sup>H NMR spectrum of CIBCTA.

1805014-SO 8 (0.153) Cm (5:12)

1: TOF MS AP+  
6.50e4

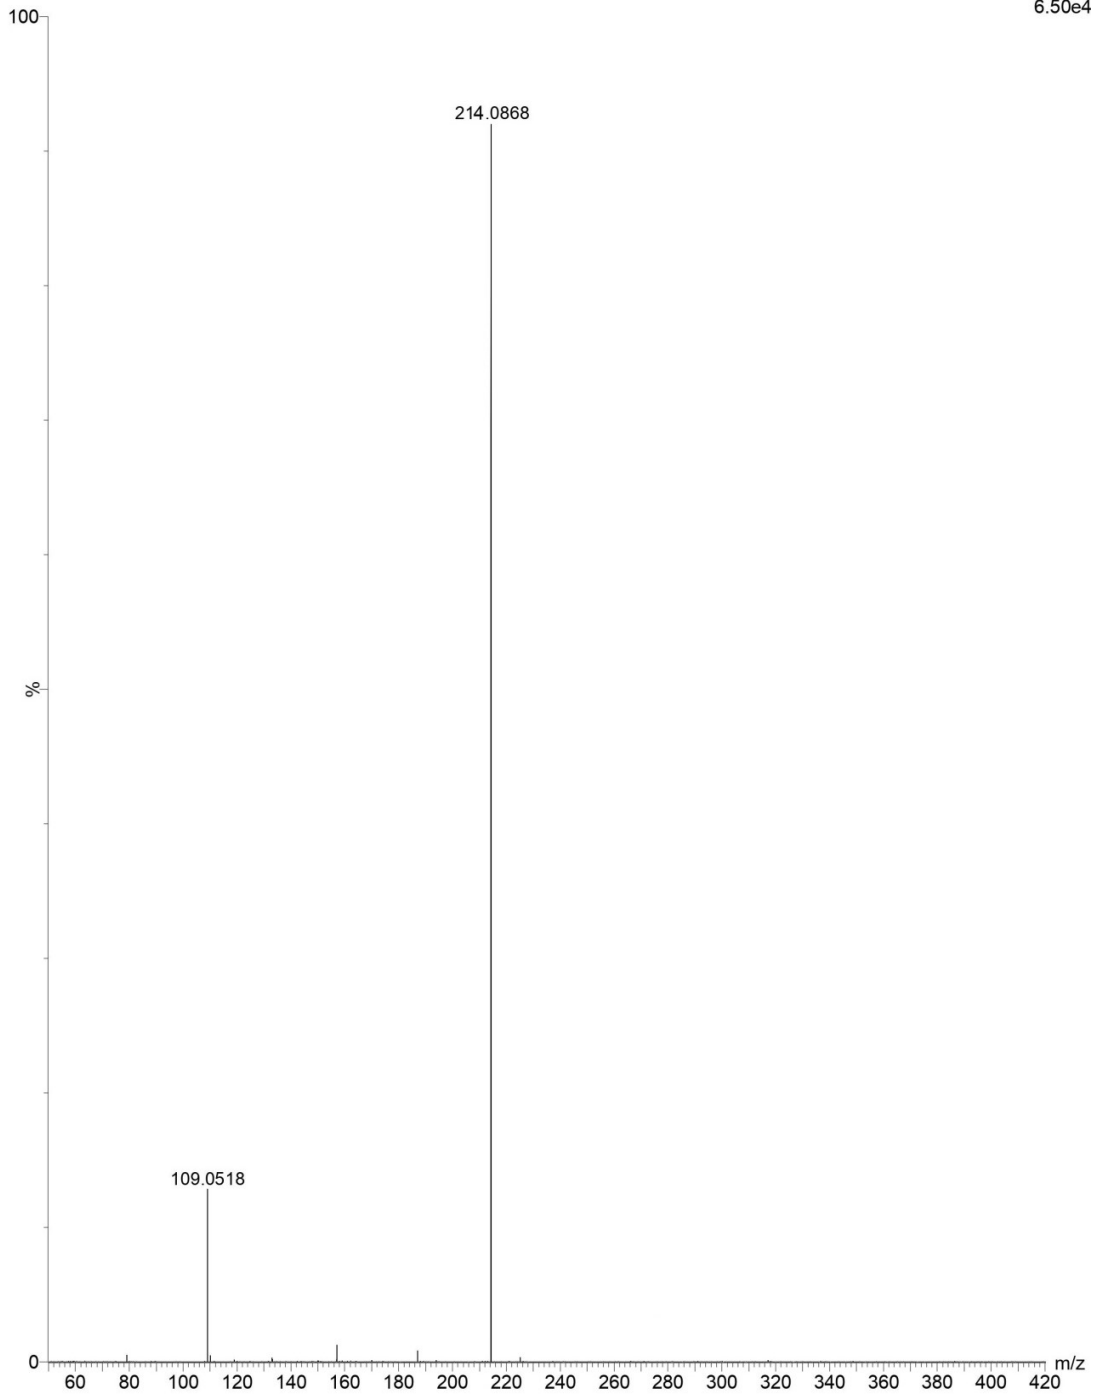

**Fig.S6:** Mass spectrum of CIBCTA.

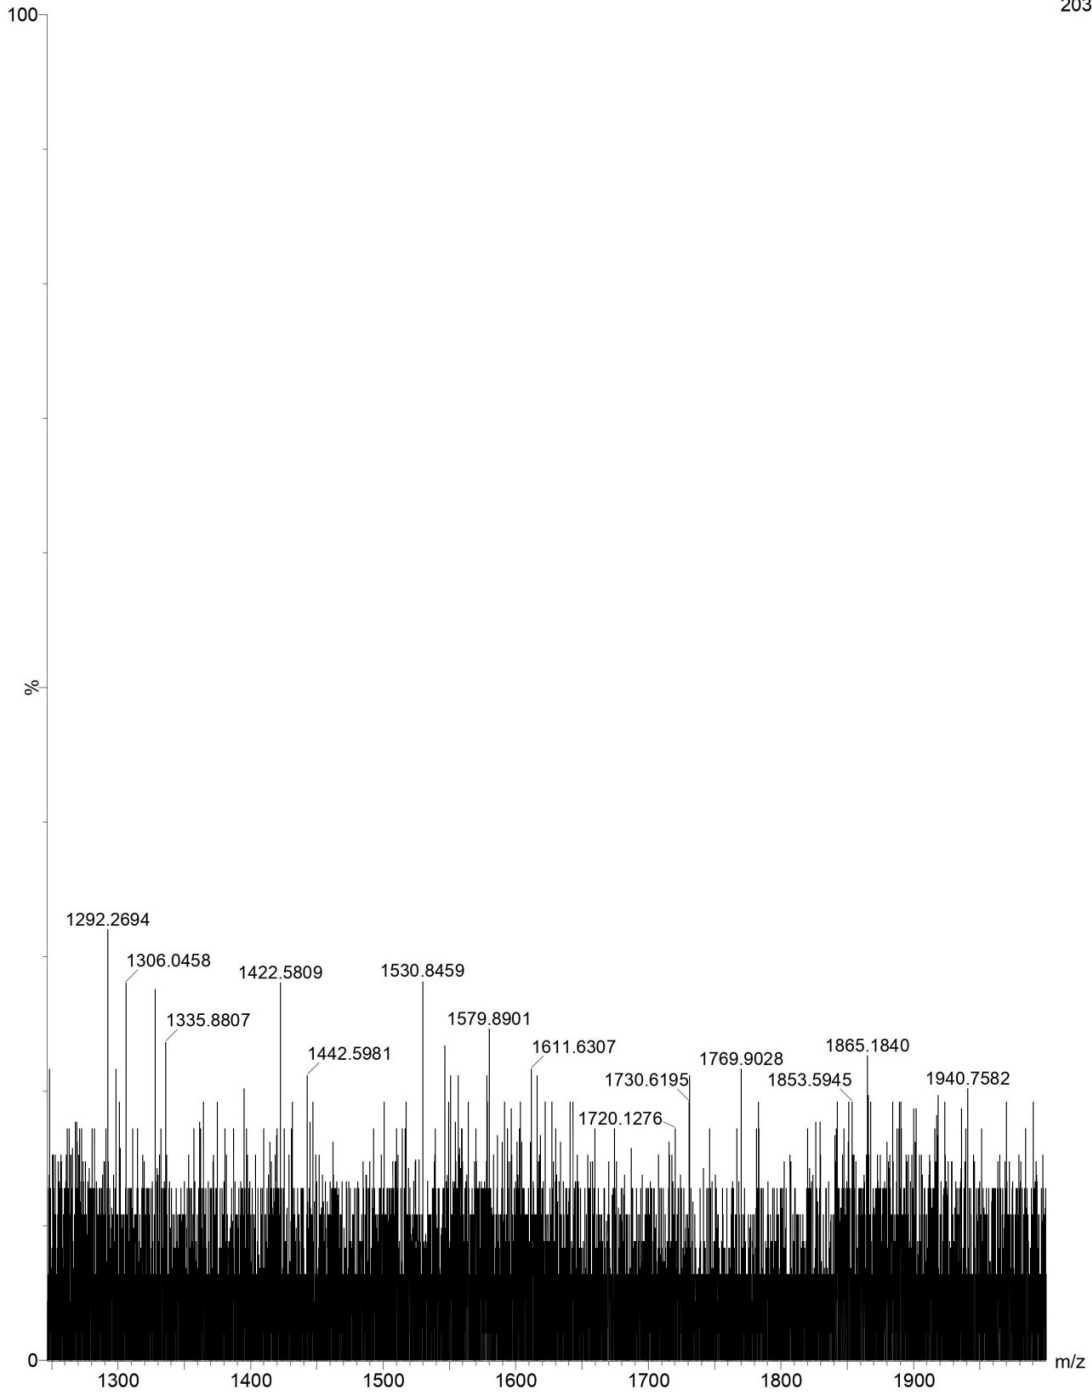

**Fig.S7:** Mass spectrum of FeTCIBTCAPc.

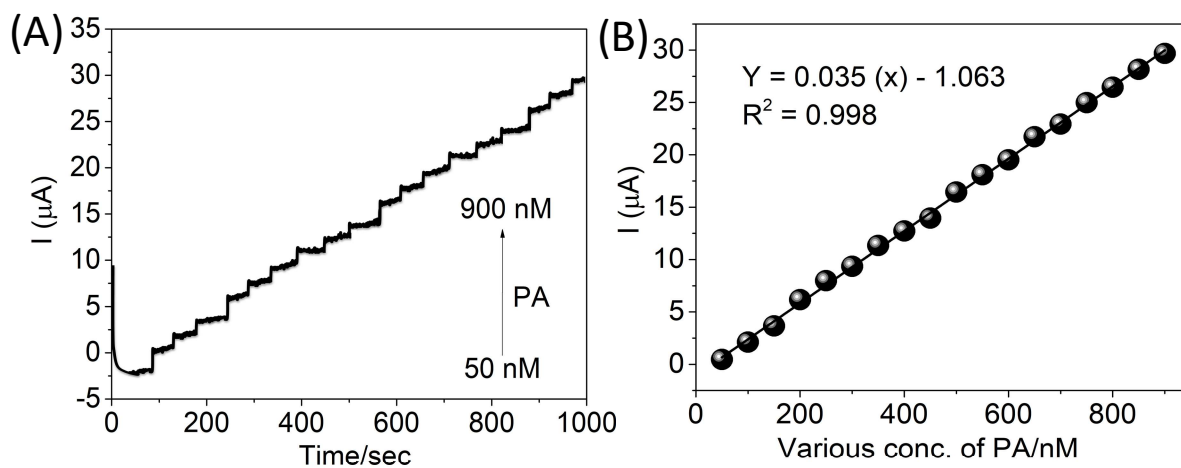

**Fig.S8:** Amperometric detection of PA. (A) Amperometric current response of PA (50-900 nM) successively addition. (B) Dependence of amperometric current response over added PA at applied potential of +430 mV.

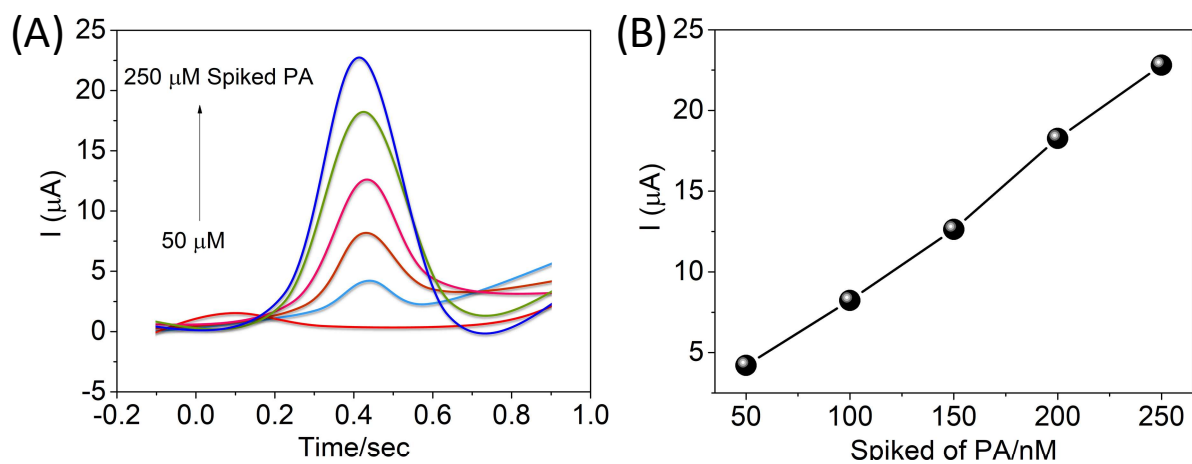

**Fig.S9:** DPV current responses of real samples analysis. (A) DPV response for PA real sample with PA in tablet sample spiking. (B) The dependence of oxidation currents over spiked of PA in tablet sample spiking.

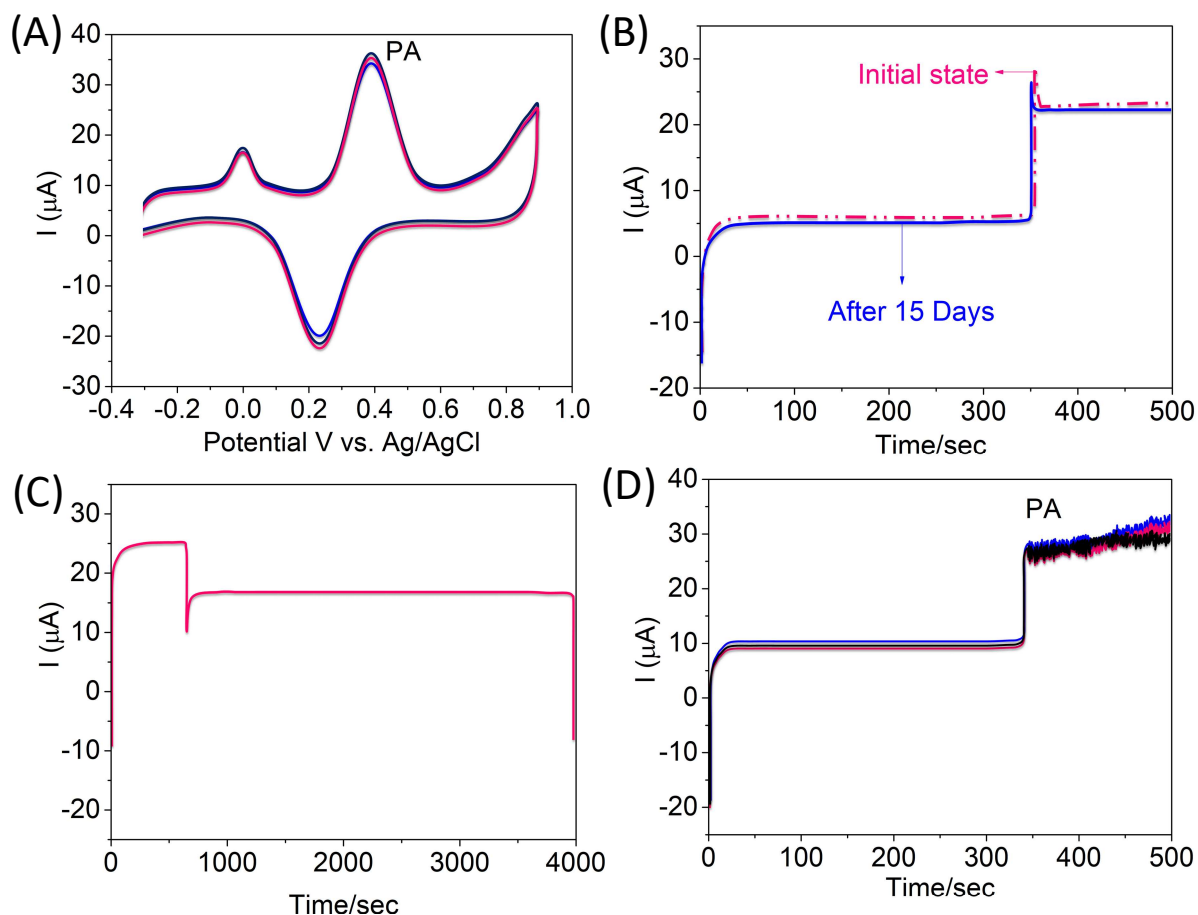

**Fig.S10:** (A) Ten successive CVs 200 nM of PA by FeTCIBCTCAPc@MWCNTs/GC electrode in PBS (pH 7) solution at scan rate of  $0.10 \text{ V s}^{-1}$ . (B) Amperometric Storage stability of the FeTCIBCTCAPc@MWCNTs/GC electrode for the response to 200 nM PA. (C) Operational stability of the FeTCIBCTCAPc@MWCNTs/GC electrode under continuous response at the optimized potential of +430 mV in a stirred PBS (pH 7) containing 200 nM PA. (D) Reproducibility of the FeTCIBCTCAPc@MWCNTs/GC electrode at the potential of +430 mV in a stirred PBS (pH 7) for injections of 200 nM PA.



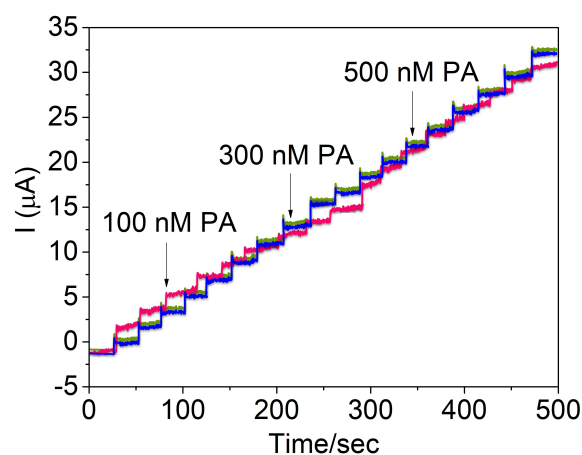

**Fig.S11:** Representative amperometric curves of three FeTCIBTCApC@MWCNTs/GC electrode prepared on a same GCE in 8 mL stirring PBS (pH 7) solution with successive additions of 300 nM PA at +430 mV (n=3).

**Table S1.** Real sample analysis for the validation of FeTCIBTCApC@MWCNTs/GC electrode loaded PA sensor

| Sample | PA          |            |               |                |               |
|--------|-------------|------------|---------------|----------------|---------------|
|        | Spiked (nM) | Found (nM) | Detected (nM) | Recoveries (%) | RSD (%) (n=3) |
| PPAT   | 50          | 0          | 49.9          | 99.8           | 102.58        |
|        | 100         |            | 100.1         | 100.1          | 103.83        |
|        | 150         |            | 150.6         | 100.5          | 101.35        |
